# Supplementary material
Source: publisher site journal article supplement (https://www.dovepress.com/article/423458)
Supplement: Supplementary file 1 [file get_supplementary_file.php]

Table S1 Baseline information

|  | Non-T2DM  n = 993 | T2DM  n = 529 | P-value |
| --- | --- | --- | --- |
| Age, year | 62.28 (10.73) | 64.63 (10.18) | <0.001 |
| Male sex | 702 (70.69%) | 361 (68.24%) | 0.321 |
| Smoking | 360 (36.25%) | 160 (30.25%) | 0.019 |
| Alcohol use | 62 (6.24%) | 28 (5.29%) | 0.454 |
| Hypertension | 545 (54.88%) | 364 (68.81%) | <0.001 |
| CAD | 681 (68.58%) | 423 (79.96%) | <0.001 |
| Chronic kidney disease | 27 (2.72%) | 26 (4.91%) | 0.025 |
| Stroke | 59 (5.94%) | 43 (8.13%) | 0.104 |
| Serum creatinine, μmol/L | 89.32 (50.70) | 96.81 (74.05) | 0.020 |
| HbA1c, %(mmol/mol) | 5.8 (0.4) [29(4)] | 7.6 (1.4) [59(16)] | <0.001 |
| Glucose, mmol/L | 5.18 (0.98) | 7.27 (2.66) | <0.001 |
| Lp(a), mg/L | 161.78 (287.10) | 143.81 (219.44) | 0.002 |
| Lg Lp(a), mg/L | 2.26 (0.42) | 2.18 (0.42) | <0.001 |
| TG, mmol/L | 1.54 (1.02) | 1.79 (1.47) | <0.001 |
| TC, mmol/L | 4.50 (1.21) | 4.37 (1.26) | 0.045 |
| LDL-C, mmol/L | 2.66 (1.06) | 2.50 (1.03) | 0.007 |
| HDL-C, mmol/L | 1.10 (0.28) | 1.01 (0.25) | <0.001 |
| Medications |  |  |  |
| ACEI/ARB | 155 (15.61%) | 103 (19.47%) | 0.056 |
| β-blocker | 185 (18.63%) | 78 (14.74%) | 0.056 |
| CCB | 130 (13.09%) | 84 (15.88%) | 0.136 |
| Diuretic | 28 (2.82%) | 30 (5.67%) | 0.006 |
| Statin | 352 (35.45%) | 198 (37.43%) | 0.444 |

Lg Lp(a) is a logarithmic transformation of Lp(a).

T2DM: type 2 diabetes mellitus; CAD: coronary artery disease; HbA1c: glycated hemoglobin; Lp(a): lipoprotein(a); TG: triglyceride; TC: total cholesterol; LDL-C: low-density lipoprotein cholesterol; HDL-C: high-density lipoprotein cholesterol; ACEI: angiotensin-converting enzyme inhibitor; ARB: angiotensin II receptor blockers, CCB: calcium channel blockers.
